# Supplementary material for: Need for Training in Research Methodology Prior to Conducting Systematic Reviews and Meta-Analyses, and the Effectiveness of an Online Training Program: The Global Andrology Forum Model
Source: PubMed Central journal article supplement — World J Mens Health. 2023 Jan 1;41(2):342–53. doi: 10.5534/wjmh.220128 (PMC10042656; doi:10.5534/wjmh.220128), 2023-01-01

**Supplement File 2.** Survey on training and management of quality in scientific research.

GAF SRMA#1 Survey

Domande Risposte 35 Impostazioni

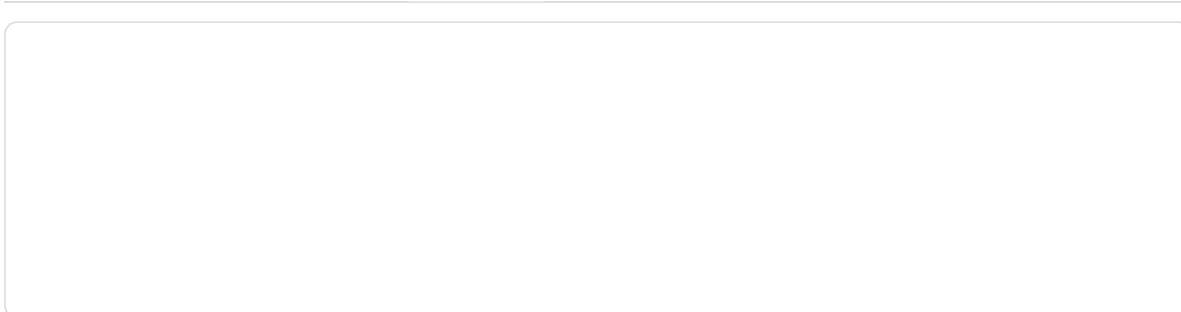

Sezione 1 di 6

## Global Andrology Forum - Educational Program

Survey #1 - Training and Management of Quality in Scientific Research

Email \*

Indirizzo email valido

Questo modulo raccoglie gli indirizzi email. [Modifica impostazioni](#)

Dopo la sezione 1 [Continua alla sezione successiva](#)

Sezione 2 di 6

## GAF Survey #1 - Training and Management of Quality in Scientific

Dear Member of the Global Andrology Forum (GAF) Varicocele Study Group,

We hope that your experience of working on the Varicocele Systematic Reviews and Meta-Analyses (SRMAe) has been both enjoyable and educational so far.

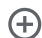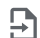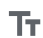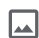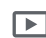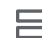

03/06/22, 11:11

GAF SRMA#1 Survey - Moduli Google

conduct such high-quality research by teaching the necessary tools and offering training, guidance and supervision in the actual conduct of the studies.

To help us understand and quantify the extent to which we have been able to enhance your research skills, we are conducting a short online survey covering these aspects. The survey will take only a few minutes, so please take the time to answer it accurately and promptly.

We look forward to your feedback.

Best wishes,  
Rupin Shah, Florence Boitrelle, Ramadan Saleh, Ashok Agarwal  
GAF Management Team

Consent for participation in the GAF Survey #1 on Training and Management of Quality in Scientific Research : \*

- YES, I hereby give my voluntary consent for participation in this survey
- NO, I hereby do not wish to participate in this survey

Dopo la sezione 2 Continua alla sezione successiva

Sezione 3 di 6

## Survey #1

Descrizione (facoltativa)

Gender : \*

- Male
- Female

Country : \*

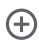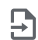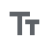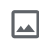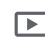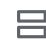

03/06/22, 11:11

GAF SRMA#1 Survey - Moduli Google

Age (years) : \*

Testo risposta breve

Highest qualification : \*

- MD
- PhD
- MD, PhD
- Masters
- Altro...

Profession : \*

- Urologist
- Reproductive Medicine Specialist
- Andrologist
- Embryologist
- Scientist/ Researcher
- Academic
- Post Graduate Student
- Altro...

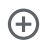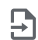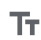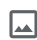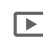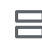

03/06/22, 11:11

GAF SRMA#1 Survey - Moduli Google

- 0 - 1 year
- 1 - 2 years
- 2 - 5 years
- 5 - 10 years
- 10 - 15 years
- 15 - 20 years
- > 20 years

Have you previously published a systematic review or meta-analysis ? \*

- YES
- NO

If you answered YES to the previous question, in what capacity was your contribution to the research study / publication ? \*

- Lead Researcher / Primary Author
- Co-Researcher / Co-Author
- Senior Researcher / Corresponding Author
- Not applicable as I answered NO to the previous question

Select your top 3 motivations to join the Global Andrology Forum : \*

- To keep yourself up to date on andrology-based research
- To learn how to do a systematic review and meta-analysis

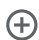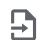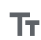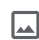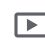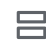

03/06/22, 11:11

GAF SRMA#1 Survey - Moduli Google

- To contribute towards studies that are working on important clinical questions
- To have the opportunity to work alongside more established clinician-scientists / academics
- To showcase your own expertise to a wider community of researchers
- To build relationships and a sense of community among peers
- To network among experts in the field with similar interests
- To advance your existing knowledge and skill set
- To gain new types of research skills

How did you get to know about the Global Andrology Forum and this research program ? \*

- ACRM Management Team
- LinkedIn
- Instagram
- Google
- Professional network
- Colleague / Friend
- Altro...

Choose the Varicocele Systematic Review and Meta-Analysis (SRMA) project(s) where you are or were part of the research team. \*

- SRMA #1
- SRMA #2
- SRMA #3

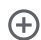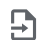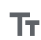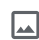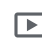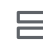

03/06/22, 11:11

GAF SRMA#1 Survey - Moduli Google

SRMA #1 and SRMA #2

- SRMA #1 and SRMA #3
- None of the above

On average, how many hours do you spend per week on the online varicocele research study ? \*

- < 2 hours
- 2 - 4 hours
- 4 - 6 hours
- 6 - 8 hours
- 8 - 10 hours
- > 10 hours

Dopo la sezione 3 Continua alla sezione successiva

Sezione 4 di 6

## PRIOR TO GAF TRAINING

Rate your knowledge on the following parameters BEFORE your training with the Global Andrology

Knowledge of conducting a literature search using Scopus : \*

- |           |                       |                       |                       |                       |                       |                       |                       |                       |                       |                       |           |
|-----------|-----------------------|-----------------------|-----------------------|-----------------------|-----------------------|-----------------------|-----------------------|-----------------------|-----------------------|-----------------------|-----------|
|           | 1                     | 2                     | 3                     | 4                     | 5                     | 6                     | 7                     | 8                     | 9                     | 10                    |           |
| Very poor | <input type="radio"/> | Excellent |

03/06/22, 11:11

GAF SRMA#1 Survey - Moduli Google

Knowledge of using Quality of Evidence (QoE) - Cambridge Quality Checklists \*

1 2 3 4 5 6 7 8 9 10

Very poor           Excellent

Knowledge of using Quality of Evidence (QoE) - Cochrane Risk of Bias Tool for Randomized Controlled Trials :

1 2 3 4 5 6 7 8 9 10

Very poor           Excellent

Knowledge of using Quality of Evidence (QoE) - Consolidated Standards of Reporting Trials (CONSORT) guidelines :

1 2 3 4 5 6 7 8 9 10

Very poor           Excellent

Knowledge of using Quality of Evidence (QoE) - Jadad (Oxford Quality) scale \*

1 2 3 4 5 6 7 8 9 10

Very poor           Excellent

Knowledge of the Population, Intervention, Comparison, Outcome (PICO) model for conducting a meta-analysis :

1 2 3 4 5 6 7 8 9 10

Very poor           Excellent

Navigation icons: +, ↵, Tt, 🖼️, ▶️, ☰

03/06/22, 11:11

GAF SRMA#1 Survey - Moduli Google

Knowledge of the data required to perform a meta-analysis : \*

|           |                       |                       |                       |                       |                       |                       |                       |                       |                       |                       |           |
|-----------|-----------------------|-----------------------|-----------------------|-----------------------|-----------------------|-----------------------|-----------------------|-----------------------|-----------------------|-----------------------|-----------|
|           | 1                     | 2                     | 3                     | 4                     | 5                     | 6                     | 7                     | 8                     | 9                     | 10                    |           |
| Very poor | <input type="radio"/> | Excellent |

Knowledge of critical reading of scientific articles : \*

|           |                       |                       |                       |                       |                       |                       |                       |                       |                       |                       |           |
|-----------|-----------------------|-----------------------|-----------------------|-----------------------|-----------------------|-----------------------|-----------------------|-----------------------|-----------------------|-----------------------|-----------|
|           | 1                     | 2                     | 3                     | 4                     | 5                     | 6                     | 7                     | 8                     | 9                     | 10                    |           |
| Very poor | <input type="radio"/> | Excellent |

Ability to organize your work and to respect deadlines : \*

|           |                       |                       |                       |                       |                       |                       |                       |                       |                       |                       |           |
|-----------|-----------------------|-----------------------|-----------------------|-----------------------|-----------------------|-----------------------|-----------------------|-----------------------|-----------------------|-----------------------|-----------|
|           | 1                     | 2                     | 3                     | 4                     | 5                     | 6                     | 7                     | 8                     | 9                     | 10                    |           |
| Very poor | <input type="radio"/> | Excellent |

Dopo la sezione 4 Continua alla sezione successiva 

Sezione 5 di 6

## POST GAF TRAINING

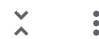

Rate your knowledge on the following parameters AFTER your training with the Global Andrology 

Knowledge of conducting a literature search using Scopus : \*

|           |                       |                       |                       |                       |                       |                       |                       |                       |                       |                       |           |
|-----------|-----------------------|-----------------------|-----------------------|-----------------------|-----------------------|-----------------------|-----------------------|-----------------------|-----------------------|-----------------------|-----------|
|           | 1                     | 2                     | 3                     | 4                     | 5                     | 6                     | 7                     | 8                     | 9                     | 10                    |           |
| Very poor | <input type="radio"/> | Excellent |

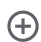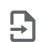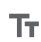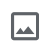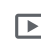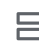



03/06/22, 11:11

GAF SRMA#1 Survey - Moduli Google

Knowledge of using Quality of Evidence (QoE) - Cambridge Quality Checklists \*

|           |                       |                       |                       |                       |                       |                       |                       |                       |                       |                       |           |
|-----------|-----------------------|-----------------------|-----------------------|-----------------------|-----------------------|-----------------------|-----------------------|-----------------------|-----------------------|-----------------------|-----------|
|           | 1                     | 2                     | 3                     | 4                     | 5                     | 6                     | 7                     | 8                     | 9                     | 10                    |           |
| Very poor | <input type="radio"/> | Excellent |

Knowledge of using Quality of Evidence (QoE) - Cochrane Risk of Bias Tool for Randomized Controlled Trials :

|           |                       |                       |                       |                       |                       |                       |                       |                       |                       |                       |           |
|-----------|-----------------------|-----------------------|-----------------------|-----------------------|-----------------------|-----------------------|-----------------------|-----------------------|-----------------------|-----------------------|-----------|
|           | 1                     | 2                     | 3                     | 4                     | 5                     | 6                     | 7                     | 8                     | 9                     | 10                    |           |
| Very poor | <input type="radio"/> | Excellent |

Knowledge of using Quality of Evidence (QoE) - Consolidated Standards of Reporting Trials (CONSORT) guidelines :

|           |                       |                       |                       |                       |                       |                       |                       |                       |                       |                       |           |
|-----------|-----------------------|-----------------------|-----------------------|-----------------------|-----------------------|-----------------------|-----------------------|-----------------------|-----------------------|-----------------------|-----------|
|           | 1                     | 2                     | 3                     | 4                     | 5                     | 6                     | 7                     | 8                     | 9                     | 10                    |           |
| Very poor | <input type="radio"/> | Excellent |

Knowledge of using Quality of Evidence (QoE) - Jadad (Oxford Quality) scale \*

|           |                       |                       |                       |                       |                       |                       |                       |                       |                       |                       |           |
|-----------|-----------------------|-----------------------|-----------------------|-----------------------|-----------------------|-----------------------|-----------------------|-----------------------|-----------------------|-----------------------|-----------|
|           | 1                     | 2                     | 3                     | 4                     | 5                     | 6                     | 7                     | 8                     | 9                     | 10                    |           |
| Very poor | <input type="radio"/> | Excellent |

Knowledge of the Population, Intervention, Comparison, Outcome (PICO) model for conducting a meta-analysis :

|           |                       |                       |                       |                       |                       |                       |                       |                       |                       |                       |           |
|-----------|-----------------------|-----------------------|-----------------------|-----------------------|-----------------------|-----------------------|-----------------------|-----------------------|-----------------------|-----------------------|-----------|
|           | 1                     | 2                     | 3                     | 4                     | 5                     | 6                     | 7                     | 8                     | 9                     | 10                    |           |
| Very poor | <input type="radio"/> | Excellent |

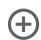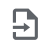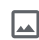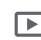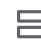

03/06/22, 11:11

GAF SRMA#1 Survey - Moduli Google

Knowledge of the data required to perform a meta-analysis : \*

1 2 3 4 5 6 7 8 9 10

Very poor           Excellent

Knowledge of critical reading of scientific articles : \*

1 2 3 4 5 6 7 8 9 10

Very poor           Excellent

Ability to organize your work and to respect deadlines : \*

1 2 3 4 5 6 7 8 9 10

Very poor           Excellent

Dopo la sezione 5 Continua alla sezione successiva

Sezione 6 di 6

## Self-Evaluation in Step 1 of SRMA #1

Rate the following parameters based on your work during Step 1 of Systematic Review and Meta-Analysis (SRMA) #1

Your quality of work : \*

1 2 3 4 5 6 7 8 9 10

Very poor           Excellent

03/06/22, 11:11

GAF SRMA#1 Survey - Moduli Google

Your communication skills : \*

1 2 3 4 5 6 7 8 9 10

Very poor           Excellent

Your ability to meet the given deadlines : \*

1 2 3 4 5 6 7 8 9 10

Very poor           Excellent

Your attitude in having to meet the given deadlines : \*

1 2 3 4 5 6 7 8 9 10

Very poor           Excellent

Your ability to improve by listening to the remarks from your Team Leader? \*

1 2 3 4 5 6 7 8 9 10

Very poor           Excellent

Did you receive feedback and explanation for changes in your work from your Team \*

YES

NO

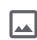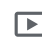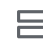

03/06/22, 11:11

GAF SRMA#1 Survey - Moduli Google

- 1
- 2
- 3
- 4
- 5
- > 5
- Not applicable as I answered NO to the previous question

If you answered YES to the previous question, what type of feedback did you receive regarding your work from your Team Leader ? \*

- Constructive
- Timely
- Personalized
- Guidance
- Encouragement
- Coaching
- Performance review
- Not applicable as I answered NO to the previous question
- Altro...

Does the educational program organized by GAF provide you with knowledge that you can use in your practice ? \*

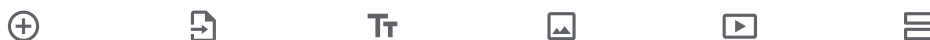

03/06/22, 11:11

GAF SRMA#1 Survey - Moduli Google

- YES, sometime in the near future
- YES, sometime in the distant future
- MAYBE
- NO

Rate the quality of explanations you received for conducting a meta-analysis during the <sup>\*</sup>  
GAF meeting (Wed, January 12th, 2022) :

|           |                       |                       |                       |                       |                       |                       |                       |                       |                       |                       |           |
|-----------|-----------------------|-----------------------|-----------------------|-----------------------|-----------------------|-----------------------|-----------------------|-----------------------|-----------------------|-----------------------|-----------|
|           | 1                     | 2                     | 3                     | 4                     | 5                     | 6                     | 7                     | 8                     | 9                     | 10                    |           |
| Very poor | <input type="radio"/> | Excellent |

Rate the quality of explanations you received for conducting a meta-analysis during your <sup>\*</sup>  
training period (First training + Pilot steps) :

|           |                       |                       |                       |                       |                       |                       |                       |                       |                       |                       |           |
|-----------|-----------------------|-----------------------|-----------------------|-----------------------|-----------------------|-----------------------|-----------------------|-----------------------|-----------------------|-----------------------|-----------|
|           | 1                     | 2                     | 3                     | 4                     | 5                     | 6                     | 7                     | 8                     | 9                     | 10                    |           |
| Very poor | <input type="radio"/> | Excellent |

Kindly give us your suggestions on how we can improve the training and feedback that <sup>\*</sup>  
the GAF educational program is providing you :

Testo risposta breve  
.....

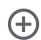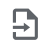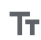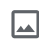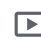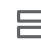

Supplement: wjmh-41-342-s002.pdf [file wjmh-41-342-s002.pdf]
