# Supplementary material for: Need for Training in Research Methodology Prior to Conducting Systematic Reviews and Meta-Analyses, and the Effectiveness of an Online Training Program: The Global Andrology Forum Model
Source: PubMed Central journal article supplement — World J Mens Health. 2023 Jan 1;41(2):342–53. doi: 10.5534/wjmh.220128 (PMC10042656; doi:10.5534/wjmh.220128), 2023-01-01

**Supplement File 4.** Global Andrology Forum: post-meeting practice test.

## Post-meeting practice test

This module is based on five research papers that were analyzed for the SRMA-1. A flow-chart on the classification of the analytic study designs is provided below for your reading. The module will close on Monday, February 7th, 5:00 p.m. EST. Once the link is closed, you will not be permitted to take the test.

*\*Campo obbligatorio*

Please write your family name \*

XXX

Please write your first name \*

XXX

Please write the email you use to communicate with the Global Andrology Forum

\*

XXX

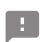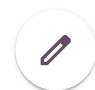

Flow-chart on analytic study designs (from <https://www.ncbi.nlm.nih.gov/pmc/articles/PMC2998589/>)

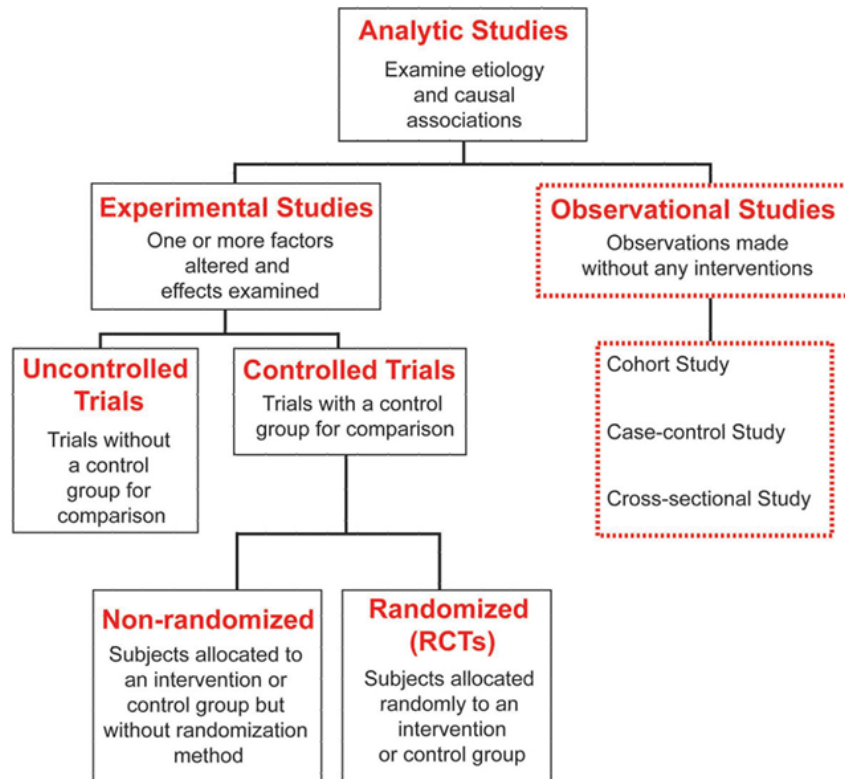

Article #127: Based on the PICO (Population, Intervention, Comparators and Outcome) model of the SRMA-1 on varicocele, the correct design that describes the article #127 is: \*

- Randomized controlled trial (RCT)
- Nonrandomized controlled trial
- Case-control study

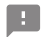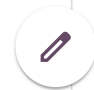

Uncontrolled cohort

Article #518: Based on the PICO (Population, Intervention, Comparators and Outcome) model of the SRMA-1 on varicocele, the design of article #518 is: \*

- Randomized controlled trial (RCT)
- Nonrandomized controlled trial
- Uncontrolled trial
- Case-control study

Item #412: Based on the PICO (Population, Intervention, Comparators and Outcome) model of the SRMA-1 on varicocele, the correct design that describes item #412 is: \*

- RCT can be included in SRMA-1
- Case-control
- Observational
- RCT can NOT be included in SRMA-1

Article #431: Based on the PICO (Population, Intervention, Comparators and Outcome) model of the SRMA-1 on varicocele, the correct design that describes article #431 is: \*

- Randomized controlled trial (RCT)
- Nonrandomized controlled trial
- Case-control study
- Uncontrolled trial

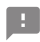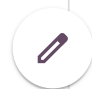

Article #1: Please indicate the "SD of the mean" of sperm count in the group of patients, before varicocele repair: \*

- 4.8
- 6.8
- 5.3
- None of the above

Ottieni link

Non inviare mai le password tramite Moduli Google.

Questi contenuti non sono creati né avallati da Google. [Segnala una violazione](#) - [Termini di servizio](#) - [Norme sulla privacy](#).

Google Moduli

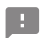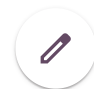

Supplement: wjmh-41-342-s004.pdf [file wjmh-41-342-s004.pdf]
