# Supplementary material for: Need for Training in Research Methodology Prior to Conducting Systematic Reviews and Meta-Analyses, and the Effectiveness of an Online Training Program: The Global Andrology Forum Model
Source: PubMed Central journal article supplement — World J Mens Health. 2023 Jan 1;41(2):342–53. doi: 10.5534/wjmh.220128 (PMC10042656; doi:10.5534/wjmh.220128), 2023-01-01
Supplement: wjmh-41-342-s003.pdf [file wjmh-41-342-s003.pdf]

**Supplement File 3.** Global Andrology Forum: pre-meeting practice test.

## Global Andrology Forum Pre-meeting practice test

This module is based on five research papers that were analyzed for the SRMA-1. The cumulative responses from this test will be used as a starting point for our discussion during the meeting on Feb 3rd. Please make a note of the doubts you may have when answering these questions, and ask us later at the meeting. This module will close on Monday, January 31st, 5:00 p.m. EST. Once the link is closed, you will not be permitted to take the test.

### Multiple Choice Questions:

Pre-meeting Practice Test

Item #1176: Based on the PICO (Population, Intervention, Comparators and Outcome) model of the SRMA1 on varicocele, item #1176 should be:

- Included due to suitable outcome data
- Included due to suitable study population and comparators
- Excluded due to different study population and comparators
- Excluded due to different intervention

Item #1383: Please indicate the SD of the mean of sperm count in the group of patients:

- 39.0
- 6.6
- 10.4
- None of them

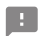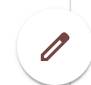

Item #37: Based on the PICO (Population, Intervention, Comparators and Outcome) model of the SRMA1 on varicocele, the correct design that describes item #37 is:

- Randomized controlled trial (RCT)
- Non-randomized controlled study
- Case-control
- Uncontrolled cohort

Item #1078: Based on the PICO (Population, Intervention, Comparators and Outcome) model of the SRMA1 on varicocele, the correct design that describes item #1078 is:

- Randomized controlled trial (RCT)
- Case-control
- Controlled cohort
- Uncontrolled cohort

Item #2925: Based on quality assessment, item #2925 is best described as:

- High quality randomized controlled trial (RCT)
- High quality controlled cohort
- Low quality RCT
- Low quality controlled cohort

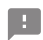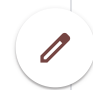

Ottieni link

Questi contenuti non sono creati né avallati da Google. [Segnala una violazione](#) - [Termini di servizio](#) - [Norme sulla privacy](#)

Google Moduli
