# Supplementary material for: Need for Training in Research Methodology Prior to Conducting Systematic Reviews and Meta-Analyses, and the Effectiveness of an Online Training Program: The Global Andrology Forum Model
Source: PubMed Central journal article supplement — World J Mens Health. 2023 Jan 1;41(2):342–53. doi: 10.5534/wjmh.220128 (PMC10042656; doi:10.5534/wjmh.220128), 2023-01-01
Supplement: wjmh-41-342-s005.pdf [file wjmh-41-342-s005.pdf]

**Supplement Table 1.** Demographics of researchers participating in the systematic reviews and meta-analyses (SRMA)

| Variable                                                                                                                     | Value     |
|------------------------------------------------------------------------------------------------------------------------------|-----------|
| Sex                                                                                                                          |           |
| Male                                                                                                                         | 26 (74.3) |
| Female                                                                                                                       | 9 (25.7)  |
| Highest qualification                                                                                                        |           |
| MD                                                                                                                           | 19 (54.3) |
| PhD                                                                                                                          | 6 (17.1)  |
| Masters                                                                                                                      | 3 (8.6)   |
| MD, PhD                                                                                                                      | 3 (8.6)   |
| Others                                                                                                                       | 4 (11.4)  |
| Profession                                                                                                                   |           |
| Urologist                                                                                                                    | 11 (31.4) |
| Urologist, andrologist                                                                                                       | 6 (17.1)  |
| Scientist/researcher                                                                                                         | 4 (11.4)  |
| Andrologist                                                                                                                  | 4 (11.4)  |
| Others                                                                                                                       | 10 (28.6) |
| Years of experience in scientific research                                                                                   |           |
| 0–1                                                                                                                          | 2 (5.7)   |
| 1–2                                                                                                                          | 1 (2.9)   |
| 2–5                                                                                                                          | 9 (25.7)  |
| 5–10                                                                                                                         | 14 (40.0) |
| 10–15                                                                                                                        | 7 (20.0)  |
| 15–20                                                                                                                        | 1 (2.9)   |
| >20                                                                                                                          | 1 (2.9)   |
| Have you previously published a systematic review or meta-analysis?                                                          |           |
| No                                                                                                                           | 18 (51.4) |
| Yes                                                                                                                          | 17 (48.6) |
| If you answered YES to the previous question, in what capacity was your contribution to the research study/publication?      |           |
| Co-researcher/co-author                                                                                                      | 7 (20.0)  |
| Lead researcher/primary author                                                                                               | 9 (25.7)  |
| Not applicable as I answered NO to the previous question                                                                     | 18 (51.4) |
| Senior researcher/corresponding author                                                                                       | 1 (2.9)   |
| How did you get to know about the Global Andrology Forum and this research program?                                          |           |
| ACRM Management Team                                                                                                         | 14 (40.0) |
| Colleague/friend                                                                                                             | 18 (51.4) |
| I was contacted by Prof Agarwal after having invited him to contribute to a Special Issue I was editing                      | 1 (2.9)   |
| Professional network                                                                                                         | 2 (5.7)   |
| Choose the Varicocele Systematic Review and Meta-Analysis (SRMA) project(s) where you are or were part of the research team. |           |
| On average, how many hours do you spend per week on the online varicocele research study?                                    |           |
| <2                                                                                                                           | 1 (2.9)   |
| 2–4                                                                                                                          | 9 (25.7)  |
| 4–6                                                                                                                          | 14 (40.0) |
| 6–8                                                                                                                          | 9 (25.7)  |
| >10                                                                                                                          | 2 (5.7)   |

Values are presented as number (%).
