# Supplementary material for: Need for Training in Research Methodology Prior to Conducting Systematic Reviews and Meta-Analyses, and the Effectiveness of an Online Training Program: The Global Andrology Forum Model
Source: PubMed Central journal article supplement — World J Mens Health. 2023 Jan 1;41(2):342–53. doi: 10.5534/wjmh.220128 (PMC10042656; doi:10.5534/wjmh.220128), 2023-01-01
Supplement: wjmh-41-342-s006.pdf [file wjmh-41-342-s006.pdf]

**Supplement Table 2.** Self-assessed scores before and after training

| Domain                                                                                                         | Score | Before training | After training |
|----------------------------------------------------------------------------------------------------------------|-------|-----------------|----------------|
| Knowledge of conducting a literature search using Scopus                                                       | 1     | 5 (14.3)        | 0 (0.0)        |
|                                                                                                                | 2     | 4 (11.4)        | 0 (0.0)        |
|                                                                                                                | 3     | 4 (11.4)        | 0 (0.0)        |
|                                                                                                                | 4     | 0 (0.0)         | 0 (0.0)        |
|                                                                                                                | 5     | 5 (14.3)        | 0 (0.0)        |
|                                                                                                                | 6     | 2 (5.7)         | 1 (2.9)        |
|                                                                                                                | 7     | 8 (22.9)        | 3 (8.6)        |
|                                                                                                                | 8     | 1 (2.9)         | 17 (48.6)      |
|                                                                                                                | 9     | 3 (8.6)         | 9 (25.7)       |
|                                                                                                                | 10    | 3 (8.6)         | 5 (14.3)       |
| Knowledge of using Quality of Evidence (QoE) - Cambridge quality checklists                                    | 1     | 9 (25.7)        | 0 (0.0)        |
|                                                                                                                | 2     | 6 (17.1)        | 0 (0.0)        |
|                                                                                                                | 3     | 2 (5.7)         | 0 (0.0)        |
|                                                                                                                | 4     | 2 (5.7)         | 0 (0.0)        |
|                                                                                                                | 5     | 3 (8.6)         | 0 (0.0)        |
|                                                                                                                | 6     | 2 (5.7)         | 4 (11.4)       |
|                                                                                                                | 7     | 4 (11.4)        | 4 (11.4)       |
|                                                                                                                | 8     | 1 (2.9)         | 15 (42.9)      |
|                                                                                                                | 9     | 4 (11.4)        | 8 (22.9)       |
|                                                                                                                | 10    | 2 (5.7)         | 4 (11.4)       |
| Knowledge of using Quality of Evidence (QoE) - Cochrane Risk of Bias Tool for Randomized Controlled Trials     | 1     | 8 (22.9)        | 0 (0.0)        |
|                                                                                                                | 2     | 5 (14.3)        | 0 (0.0)        |
|                                                                                                                | 3     | 3 (8.6)         | 0 (0.0)        |
|                                                                                                                | 4     | 2 (5.7)         | 0 (0.0)        |
|                                                                                                                | 5     | 2 (5.7)         | 1 (2.9)        |
|                                                                                                                | 6     | 4 (11.4)        | 5 (14.3)       |
|                                                                                                                | 7     | 5 (14.3)        | 7 (20.0)       |
|                                                                                                                | 8     | 0 (0.0)         | 13 (37.1)      |
|                                                                                                                | 9     | 4 (11.4)        | 5 (14.3)       |
|                                                                                                                | 10    | 2 (5.7)         | 4 (11.4)       |
| Knowledge of using Quality of Evidence (QoE) - Consolidated Standards of Reporting Trials (CONSORT) guidelines | 1     | 8 (22.9)        | 0 (0.0)        |
|                                                                                                                | 2     | 4 (11.4)        | 0 (0.0)        |
|                                                                                                                | 3     | 3 (8.6)         | 0 (0.0)        |
|                                                                                                                | 4     | 3 (8.6)         | 0 (0.0)        |
|                                                                                                                | 5     | 2 (5.7)         | 1 (2.9)        |
|                                                                                                                | 6     | 4 (11.4)        | 5 (14.3)       |
|                                                                                                                | 7     | 4 (11.4)        | 6 (17.1)       |
|                                                                                                                | 8     | 1 (2.9)         | 13 (37.1)      |
|                                                                                                                | 9     | 4 (11.4)        | 4 (11.4)       |
|                                                                                                                | 10    | 2 (5.7)         | 6 (17.1)       |
| Knowledge of using Quality of Evidence (QoE) - Jadad (Oxford Quality) scale                                    | 1     | 10 (28.6)       | 0 (0.0)        |
|                                                                                                                | 2     | 4 (11.4)        | 0 (0.0)        |
|                                                                                                                | 3     | 3 (8.6)         | 0 (0.0)        |
|                                                                                                                | 4     | 2 (5.7)         | 0 (0.0)        |
|                                                                                                                | 5     | 2 (5.7)         | 2 (5.7)        |
|                                                                                                                | 6     | 5 (14.3)        | 4 (11.4)       |
|                                                                                                                | 7     | 2 (5.7)         | 3 (8.6)        |
|                                                                                                                | 8     | 1 (2.9)         | 13 (37.1)      |
|                                                                                                                | 9     | 5 (14.3)        | 6 (17.1)       |
|                                                                                                                | 10    | 1 (2.9)         | 7 (20.0)       |

Supplement Table 2. Continued

| Domain                                                                                                     | Score | Before training | After training |
|------------------------------------------------------------------------------------------------------------|-------|-----------------|----------------|
| Knowledge of the Population, Intervention, Comparison, Outcome (PICO) model for conducting a meta-analysis | 1     | 7 (20.0)        | 0 (0.0)        |
|                                                                                                            | 2     | 4 (11.4)        | 0 (0.0)        |
|                                                                                                            | 3     | 2 (5.7)         | 0 (0.0)        |
|                                                                                                            | 4     | 3 (8.6)         | 1 (2.9)        |
|                                                                                                            | 5     | 3 (8.6)         | 2 (5.7)        |
|                                                                                                            | 6     | 1 (2.9)         | 5 (14.3)       |
|                                                                                                            | 7     | 4 (11.4)        | 2 (5.7)        |
|                                                                                                            | 8     | 5 (14.3)        | 12 (34.3)      |
|                                                                                                            | 9     | 4 (11.4)        | 8 (22.9)       |
|                                                                                                            | 10    | 2 (5.7)         | 5 (14.3)       |
| Knowledge of the data required to perform a meta-analysis                                                  | 1     | 4 (11.4)        | 0 (0.0)        |
|                                                                                                            | 2     | 3 (8.6)         | 0 (0.0)        |
|                                                                                                            | 3     | 6 (17.1)        | 0 (0.0)        |
|                                                                                                            | 4     | 2 (5.7)         | 1 (2.9)        |
|                                                                                                            | 5     | 4 (11.4)        | 2 (5.7)        |
|                                                                                                            | 6     | 4 (11.4)        | 4 (11.4)       |
|                                                                                                            | 7     | 4 (11.4)        | 4 (11.4)       |
|                                                                                                            | 8     | 2 (5.7)         | 11 (31.4)      |
|                                                                                                            | 9     | 4 (11.4)        | 9 (25.7)       |
|                                                                                                            | 10    | 2 (5.7)         | 4 (11.4)       |
| Knowledge of critical reading of scientific articles                                                       | 1     | 0 (0.0)         | 0 (0.0)        |
|                                                                                                            | 2     | 1 (2.9)         | 0 (0.0)        |
|                                                                                                            | 3     | 1 (2.9)         | 0 (0.0)        |
|                                                                                                            | 4     | 3 (8.6)         | 0 (0.0)        |
|                                                                                                            | 5     | 0 (0.0)         | 1 (2.9)        |
|                                                                                                            | 6     | 5 (14.3)        | 0 (0.0)        |
|                                                                                                            | 7     | 8 (22.9)        | 0 (0.0)        |
|                                                                                                            | 8     | 5 (14.3)        | 11 (31.4)      |
|                                                                                                            | 9     | 7 (20.0)        | 14 (40.0)      |
|                                                                                                            | 10    | 5 (14.3)        | 9 (25.7)       |
| Ability to organize your work and to respect deadlines                                                     | 1     | 0 (0.0)         | 0 (0.0)        |
|                                                                                                            | 2     | 0 (0.0)         | 0 (0.0)        |
|                                                                                                            | 3     | 0 (0.0)         | 0 (0.0)        |
|                                                                                                            | 4     | 1 (2.9)         | 0 (0.0)        |
|                                                                                                            | 5     | 4 (11.4)        | 0 (0.0)        |
|                                                                                                            | 6     | 3 (8.6)         | 0 (0.0)        |
|                                                                                                            | 7     | 2 (5.7)         | 2 (5.7)        |
|                                                                                                            | 8     | 4 (11.4)        | 5 (14.3)       |
|                                                                                                            | 9     | 7 (20.0)        | 12 (34.3)      |
|                                                                                                            | 10    | 14 (40.0)       | 16 (45.7)      |

Values are presented as number (%).
