# Supplementary material for: Need for Training in Research Methodology Prior to Conducting Systematic Reviews and Meta-Analyses, and the Effectiveness of an Online Training Program: The Global Andrology Forum Model
Source: PubMed Central journal article supplement — World J Mens Health. 2023 Jan 1;41(2):342–53. doi: 10.5534/wjmh.220128 (PMC10042656; doi:10.5534/wjmh.220128), 2023-01-01
Supplement: wjmh-41-342-s007.pdf [file wjmh-41-342-s007.pdf]

**Supplement Table 3.** The impact of training on performance

| Score | Your quality of work | Your communication skills | Your ability to meet the given deadlines | Your attitude in having to meet the given deadlines | Your ability to improve by listening to the remarks from your Team Leader? |
|-------|----------------------|---------------------------|------------------------------------------|-----------------------------------------------------|----------------------------------------------------------------------------|
| 1     | 0 (0.0)              | 0 (0.0)                   | 0 (0.0)                                  | 0 (0.0)                                             | 0 (0.0)                                                                    |
| 2     | 0 (0.0)              | 0 (0.0)                   | 0 (0.0)                                  | 0 (0.0)                                             | 0 (0.0)                                                                    |
| 3     | 0 (0.0)              | 0 (0.0)                   | 0 (0.0)                                  | 0 (0.0)                                             | 0 (0.0)                                                                    |
| 4     | 0 (0.0)              | 0 (0.0)                   | 0 (0.0)                                  | 0 (0.0)                                             | 0 (0.0)                                                                    |
| 5     | 0 (0.0)              | 0 (0.0)                   | 0 (0.0)                                  | 0 (0.0)                                             | 0 (0.0)                                                                    |
| 6     | 0 (0.0)              | 1 (2.9)                   | 0 (0.0)                                  | 0 (0.0)                                             | 0 (0.0)                                                                    |
| 7     | 8 (22.9)             | 8 (22.9)                  | 2 (5.7)                                  | 1 (2.9)                                             | 2 (5.7)                                                                    |
| 8     | 9 (25.7)             | 9 (25.7)                  | 5 (14.3)                                 | 9 (25.7)                                            | 10 (28.6)                                                                  |
| 9     | 15 (42.9)            | 9 (25.7)                  | 11 (31.4)                                | 8 (22.9)                                            | 15 (42.9)                                                                  |
| 10    | 3 (8.6)              | 8 (22.9)                  | 17 (48.6)                                | 17 (48.6)                                           | 8 (22.9)                                                                   |

Values are presented as number (%).
