# Supplementary material for: Need for Training in Research Methodology Prior to Conducting Systematic Reviews and Meta-Analyses, and the Effectiveness of an Online Training Program: The Global Andrology Forum Model
Source: PubMed Central journal article supplement — World J Mens Health. 2023 Jan 1;41(2):342–53. doi: 10.5534/wjmh.220128 (PMC10042656; doi:10.5534/wjmh.220128), 2023-01-01
Supplement: wjmh-41-342-s008.pdf [file wjmh-41-342-s008.pdf]

**Supplement Table 4.** Paired scores comparison before and after training

| Item                                                                                                           | Before      | After       | p-value |
|----------------------------------------------------------------------------------------------------------------|-------------|-------------|---------|
| Knowledge of conducting a literature search using Scopus                                                       | 5 (2.5–7.0) | 8 (8.0–9.0) | <0.001  |
| Knowledge of using Quality of Evidence (QoE) - Cambridge Quality Checklists                                    | 4 (1.5–7.0) | 8 (8.0–9.0) | <0.001  |
| Knowledge of using Quality of Evidence (QoE) - Cochrane Risk of Bias Tool for Randomized Controlled Trials     | 4 (2.0–7.0) | 8 (7.0–8.5) | <0.001  |
| Knowledge of using Quality of Evidence (QoE) - Consolidated Standards of Reporting Trials (CONSORT) guidelines | 4 (2–7)     | 8 (7–9)     | <0.001  |
| Knowledge of using Quality of Evidence (QoE) - Jadad (Oxford Quality) scale                                    | 4 (1.0–6.5) | 8 (7.5–9.0) | <0.001  |
| Knowledge of the Population, Intervention, Comparison, Outcome (PICO) model for conducting a meta-analysis     | 5 (2–8)     | 8 (7–9)     | <0.001  |
| Knowledge of the data required to perform a meta-analysis                                                      | 5 (3–7)     | 8 (7–9)     | <0.001  |
| Knowledge of critical reading of scientific articles                                                           | 7.3±2.1     | 8.8±1.0     | <0.001  |
| Ability to organize your work and to respect deadlines                                                         | 8.3±1.9     | 9.2±0.9     | 0.002   |

Values are presented as median (interquartile range) or mean±standard deviation.
